# Supplementary material for: Novel Compounds Derived from DFPM Induce Root Growth Arrest through the Specific VICTR Alleles of Arabidopsis Accessions
Source: MDPI journal article supplement (doi:10.3390/life13091797), 2023-08-23
Supplement: s1 [file s1]

|                                                                                                                                                                    |                                                                                                                                                                             |
|--------------------------------------------------------------------------------------------------------------------------------------------------------------------|-----------------------------------------------------------------------------------------------------------------------------------------------------------------------------|
| <b>DFPM-1</b><br>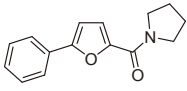<br>[5-Phenyl-2-furyl](1-pyrrolidinyl)methanone                  | <b>DFPM-15</b><br><br>[5-Phenyl-2-furyl](1-pyrrolidinyl)methanethione                     |
| <b>DFPM-2</b><br><br>[5-Phenyl-2-furyl](1-morpholidinyl)methanone                 | <b>DFPM-16</b><br><br>[5-Phenyl-2-furyl](1-morpholidinyl)methanethione                    |
| <b>DFPM-3</b><br><br>[5-(4-methoxy)-2-furyl](1-piperidinyl)methanone              | <b>DFPM-17</b><br><br>[5-(4-methoxy)-2-furyl](1-piperidinyl)methanethione                 |
| <b>DFPM-4</b><br><br>[5-(3,4-Dichlorophenyl)-2-furyl](1-morpholidinyl)methanone   | <b>DFPM-18</b><br><br>[5-(3,4-Dichlorophenyl)-2-furyl](1-morpholidinyl)methanethione      |
| <b>DFPM-5</b><br><br>[5-(3,4-Dichlorophenyl)-2-furyl](1-piperidinyl)methanone     | <b>DFPM-19 (DFPM)</b><br><br>[5-(3,4-Dichlorophenyl)-2-furyl](1-piperidinyl)methanethione |
| <b>DFPM-6</b><br><br>N,N-Dimethyl-[5-(3,4-Dichlorophenyl)-2-furyl]amide           | <b>DFPM-20</b><br><br>N,N-Dimethyl-[5-(3,4-Dichlorophenyl)-2-furyl]thioamide              |
| <b>DFPM-7</b><br><br>[5-(2,4-Dichlorophenyl)-2-furyl](1-pyrrolidinyl)methanone    | <b>DFPM-21</b><br><br>[5-(2,4-Dichlorophenyl)-2-furyl](1-pyrrolidinyl)methanethione       |
| <b>DFPM-8</b><br><br>[5-(2,4-Dichlorophenyl)-2-furyl](1-piperidinyl)methanone    | <b>DFPM-22</b><br><br>[5-(2,4-Dichlorophenyl)-2-furyl](1-piperidinyl)methanethione       |
| <b>DFPM-9</b><br><br>[5-(2,4-Dichlorophenyl)-2-furyl](1-morpholidinyl)methanone | <b>DFPM-23</b><br><br>[5-(2,4-Dichlorophenyl)-2-furyl](1-morpholidinyl)methanethione    |
| <b>DFPM-10</b><br><br>N-cyclopropyl-[5-(4-chlorophenyl)-2-furyl]amide           | <b>DFPM-24</b><br><br>N-cyclopropyl-[5-(4-chlorophenyl)-2-furyl]thioamide               |
| <b>DFPM-11</b><br><br>[5-(4-chlorophenyl)-2-furyl](1-piperidinyl)methanone      | <b>DFPM-25</b><br><br>[5-(4-chlorophenyl)-2-furyl](1-piperidinyl)methanethione          |
| <b>DFPM-12</b><br><br>[5-(4-chlorophenyl)-2-furyl](1-pyrrolidinyl)methanone     | <b>DFPM-26</b><br><br>[5-(4-chlorophenyl)-2-furyl](1-pyrrolidinyl)methanethione         |
| <b>DFPM-13</b><br><br>N,N-Dimethyl [5-(2-chlorophenyl)-2-furyl]amide            | <b>DFPM-27</b><br><br>N,N-Dimethyl [5-(2-chlorophenyl)-2-furyl]thioamide                |
| <b>DFPM-14</b><br><br>[5-(2-chlorophenyl)-2-furyl](1-piperidinyl)methanone      | <b>DFPM-28</b><br><br>[5-(2-chlorophenyl)-2-furyl](1-piperidinyl)methanethione          |

**Figure S1.** Chemical structures of DFPM derivatives.

Twenty-two chemical compounds structurally similar to DFPM were synthesized by modifying the phenyl and amide groups. Each of the 14 compounds contained within a left column is a precursor of the compound on the right side. The original DFPM is designated here as DFPM-19. The DFPM-4, -6, -10, -11, and -14 were excluded from further analysis because of their low yield in synthesis.
