# Supplementary material for: Novel Compounds Derived from DFPM Induce Root Growth Arrest through the Specific VICTR Alleles of Arabidopsis Accessions
Source: Life (Basel). 2023 Aug 23;13(9):1797. doi: 10.3390/life13091797 (PMC10532556; doi:10.3390/life13091797)
Supplement: Supplementary file 1 [file life-13-01797-s001.zip › Table S1.xlsx]

## Sheet: Sheet1
Table S1. The primers used in this experiment
Purpose	Name	Sequence (5'-3')
qRT-PCR	Clathrin-F	ATACGCGCTGAGTTCCC
	Clathrin-R	CTGACTGGCCCTGCTT
	RAB18-F	TTCACCGCTCCGGATCTGGAT
	RAB18-R	GCTCATTACACACTCATGTAAGTA
	RD29B-F	TGGGAAGAGACTTACCGACGGGAACTCATG
	RD29B-R	CGGAGAGAGGTAGCTTTGTCATCACCGTTG
	PR2-F	GTGTATGCATGATCACATCATTACTTC
	PR2-R	TCCTTCTTCAACCACACAGCTGGAC
	PR5-F	CTGTGTCTCTGACCTCAACGCGGC
	PR5-R	CGTTTCGTCGTCATAAGCGTAGCTA
Comparative sequence analysis	VICTR-F1	GTTTCCTCCTTCTAACTCTCTCTATG
	VICTR-F2	CGGTGAATTTGGAAGTATCTTTGA
	VICTR-F3	TTGGTTCAGCTCTACGAGGGAGA
	VICTR-F4	GTGTACATGAGAATGCCTTCAAAG
	VICTR-F5	CAGGGTACTCGAAAGGTGCTAGGA
	VICTR-F6	GCCAAGGAGTGAAGGTATATGTAGT
	VICTR-F7	TCCAATTGCGGGGCATTGACCAGA
	VICTR-F8	CGTATCCGTCTATACAAAGATAATG
	VICTR-F9	CAGTGGCCAGTAGGATAATGA
	VICTR-F10	AGGTGCACTGGGAGAGAGGCT
	VICTR-F11	GTCAGCTATGATGCGATAGGCA
	VICTR-F12	GGTAAGGTTTAAGAATAAATTGTT
	VICTR-F13	CTTAGAGACCGGTTCATCAGCA
	VICTR-F14	GATCAGAGCGAAGAGCGAGGATAAGA
	VICTR-R1	TACCATTTGGCAGAATCAAATCCA
	VICTR-R2	CTGTACTCAGACAAAAATAAACGCA
	VICTR-R3	CTCATATGAAGTGGTGTAGCTGCAA
	VICTR-R4	GTGGCTACGGAATGTTACGCG
	VICTR-R5	GAGTTCTCAGCAGAATCCGTGGA
	VICTR-R6	ACATCTCTTGAGCGCGCTC
	VICTR-R7	GTCAGTGGACTGTGAGCGTAC
	VICTR-R8	CCGGTAAATGCACTTTGACTTC
	VICTR-R9	GATGCCCACATATCCAATTCC
	VICTR-R10	CAGCATCGGCATGAAGGGCTGAAC
	VICTR-R11	GAGAAGAGGTGGTCTCCTCAGA
	VICTR-R12	CTGATGAACCGGTCTCTAAGAGTC
	VICTR-R13	CTAACAATCTAATTATCCCACA
	VICTR-R14	AGCAAGTCAGTCGTTCGTTGTCTC
Map-based cloning	F16J7-F	TGATGTTGAGATCTGTGTGCAG
	F16J7-R	GTGTCTTGATACGCGTCGAT
	CIW12-F	AGGTTTTATTGCTTTTCACA
	CIW12-R	CTTTCAAAAGCACATCACA
	CIW1-F	ACATTTTCTCAATCCTTACTC
	CIW1-R	GAGAGCTTCTTTATTTGTGAT
	NGA280-F	GGCTCCATAAAAAGTGCACC
	NGA280-R	CTGATCTCACGGACAATAGTGC
	NGA111-F	TGTTTTTTAGGACAAATGGCG
	NGA111-R	CTCCAGTTGGAAGCTAAAGGG
	CWI2-F	CCCAAAAGTTAATTATACTGT
	CWI2-R	CCGGGTTAATAATAAATGT
	CWI3-F	GAAACTCAATGAAATCCACTT
	CWI3-R	TGAACTTGTTGTGAGCTTTGA
	G009-F	AACTTACATTCTTCAATCCTTCG
	G009-R	TGACTAGAGTGTATTTGATGTGG
	NGA168-F	GAGGACATGTATAGGAGCCTCG
	NGA168-R	TCGTCTACTGCACTGCCG
	NGA162-F	CTCTGTCACTCTTTTCCTCTGG
	NGA162-R	CATGCAATTTGCATCTGAGG
	CIW11-F	CCCCGAGTTGAGGTATT
	CIW11-R	GAAGAAATTCCTAAAGCATTC
	CIW4-F	GTTCATTAAACTTGCGTGTGT
	CIW4-R	TACGGTCAGATTGAGTGATTC
	NGA6-F	ATGGAGAAGCTTACACTGATC
	NGA6-R	TGGATTTCTTCCTCTCTTCAC
	CIW5-F	GGTTAAAAATTAGGGTTACGA
	CIW5-R	AGATTTACGTGGAAGCAAT
	CIW6-F	CTCGTAGTGCACTTTCATCA
	CIW6-R	CACATGGTTAGGGAAACAATA
	CIW7-F	AATTTGGAGATTAGCTGGAAT
	CIW7-R	CCATGTTGATGATAAGCACAA
	NGA1107-F	CGACGAATCGACAGAATTAGG
	NAG1107-R	GCGAAAAAACAAAAAAATCCA
	CTR1-F	CCACTTGTTTCTCTCTCTAG
	CTR1-R	TATCAACAGAAACGCACCGAG
	CIW8-F	TAGTGAAACCTTTCTCAGAT
	CIW8-R	TTATGTTTTCTTCAATCAGTT
	PHYC-F	CTCAGAGAATTCCCAGAAAAATCT
	PHYC-R	AAACTCGAGAGTTTTGTCTAGATC
	CIW9-F	CAGACGTATCAAATGACAAATG
	CIW9-R	GACTACTGCTCAAACTATTCGG
	MBK-5-F	GAGCATTTCACAGAGACG
	MBK-5-R	ATCACTGTTGTTTACCATTA
	K23L20-F	GTCGTAGAAGTAGCAGCTTGTACGAAGT
	K23L20-R	TCTCAATCCAATGTTCAGGTGACACACT
	K14A3-F	GAATCTCTAACGATGCTAACACAAGGA
	K14A3-R	CTGCAATCACAGTTTAAGTCATGAACT
	UPSC5-18624-F	AGCTGTGGATCTTCCCCTTA
	UPSC5-18624-R	TCTCACAAGTGCCTCAAACG
	UPSC5-19138-F	AACTCATGCAATGCGACATC
	UPSC5-19138-R	CCCGTCCATGATCTGTTTCT
